# Supplementary material for: Effect of Composition and Freeze-Thaw on the Network Structure, Porosity and Mechanical Properties of Polyvinyl-Alcohol/Chitosan Hydrogels
Source: MDPI journal article supplement (doi:10.3390/gels9050396), 2023-05-09
Supplement: s1 [file s1]

# Supplementary Information

## Effect of composition and freeze-thaw on the network structure, porosity and mechanical properties of Polyvinyl-alcohol/Chitosan hydrogels

**Fernando Soto-Bustamante<sup>1,2</sup>, Gavino Bassu<sup>1,2</sup>, Emiliano Fratini<sup>1,2</sup> and Marco Laurati<sup>1,2\*</sup>**

<sup>1</sup> Dipartimento di Chimica, Università di Firenze, 50019 Sesto Fiorentino, Italy

<sup>2</sup> Consorzio per lo Sviluppo dei Sistemi a Grande Interfase (CSGI), c/o Università di Firenze, 50019 Sesto Fiorentino, Italy

\*Correspondence: marco.laurati@unifi.it

We report additional experimental data and extracted parameters that complement those presented in the main article. Section 1 reports EWC values for gels obtained with FT cycles F12/T12 and F18/T6, and exemplary kinetic curves used to determine EWC, for gels obtained with F6T18. Section 2 presents additional SAXS measurements and the corresponding parameters obtained from modeling for: i) samples containing high  $M_w$  Chitosan and obtained through Freeze-Thaw cycles F6/T18 and F18/T6, ii) samples containing medium  $M_w$  Chitosan and obtained through Freeze-Thaw cycles F6/T18, F12/T12 and F18/T6. Section 3 reports a comparison of SEM images, confocal stacks and porosity renderings of samples containing high  $M_w$  Chitosan and obtained through Freeze-Thaw cycles F6/T18, F12/T12 and F18/T6. Section 4 presents i) plots of the parameters characterizing the 2D porosity of samples containing high  $M_w$  Chitosan. ii) plots of the distributions of pore volumes and sphericity of samples containing high  $M_w$  Chitosan and obtained through Freeze-Thaw cycles F12/T12 and F18/T6. Section 5 reports linear viscoelastic moduli obtained from oscillatory rheology of samples containing high  $M_w$  Chitosan and obtained through Freeze-Thaw cycles F12/T12 and F18/T6

### 1. Swelling behavior

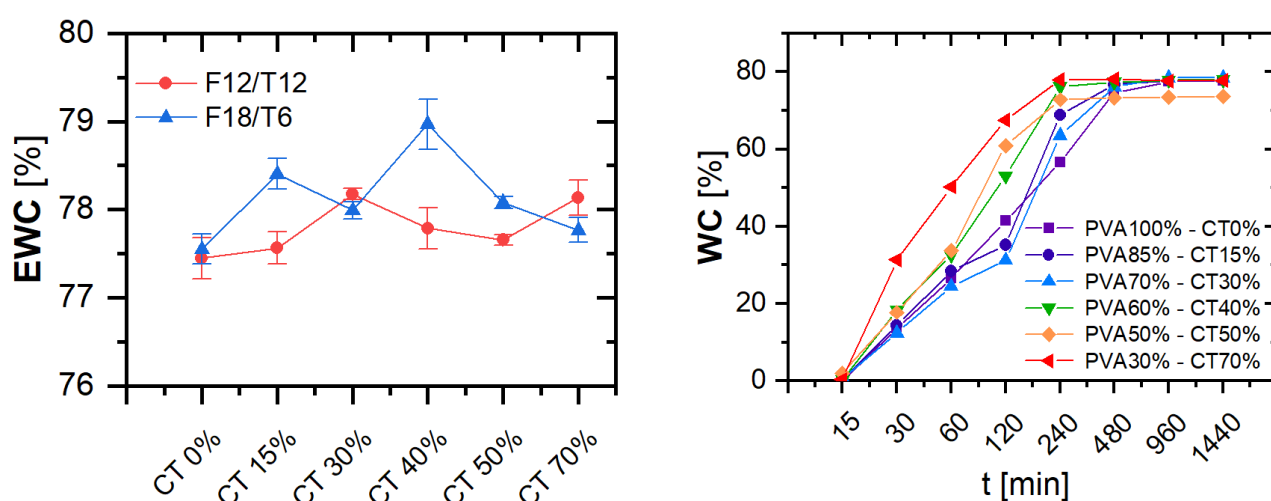

**Figure S1.** Left: Equilibrium water content (EWC) for the freeze-thawing cycles F12/T12 and F18/T6 as a function of Chitosan content. To drain excess water unconnected into the gel structure, all hydrogels were centrifuged at 1000 rpm for 10 minutes. Right: Exemplary kinetic adsorption curves used to determine EWC, for gels obtained with F6T18.

## 2. Nanoscale structure, SAXS parameters and plots

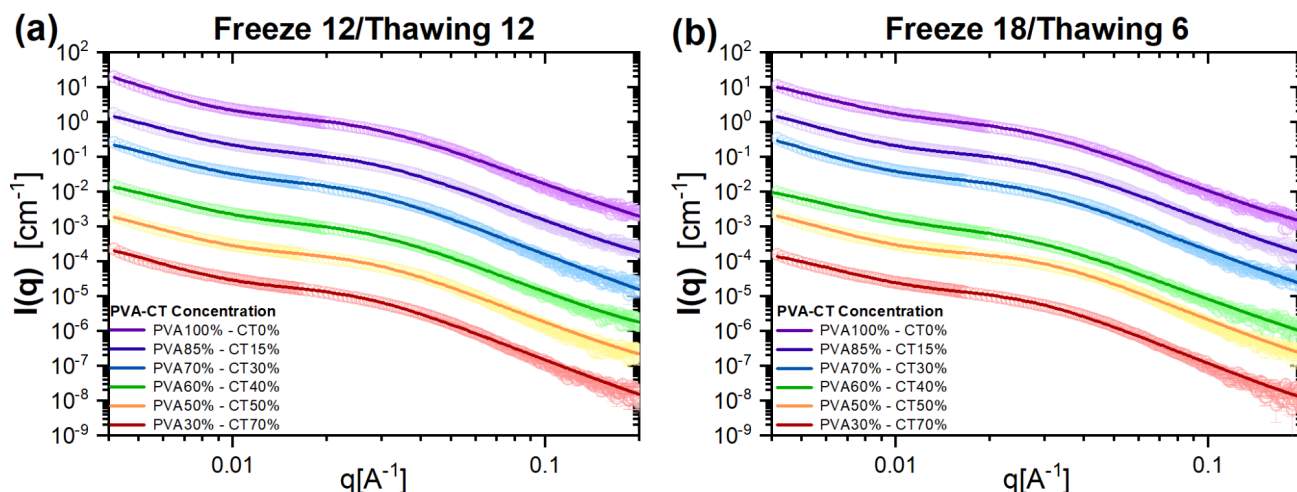

**Figure S2.** SAXS intensity curves  $I(q)$  vs.  $q$  for samples with different PVA/CT content obtained using the same FT cycle (a) F12/T12 and (b) F18/T6. For clarity the curves are displaced along the y-axes. Lines are fits to the model of eq. 3 in the main article

**Table S1.** SAXS parameters obtained from modeling the curves reported in figure S1 with equation 3 of the main article.

| Sample             | $l_{\text{lor}}(0)$ | $\zeta$ [nm]      | $m$             | $l_{\text{ex}}(0)$ | $a$ [nm]         |
|--------------------|---------------------|-------------------|-----------------|--------------------|------------------|
| P100%-C0% F6/T18   | $0.86 \pm 0.01$     | $3.8209 \pm 0.01$ | $3.37 \pm 0.02$ | $101.89 \pm 0.84$  | $33.75 \pm 0.20$ |
| P100%-C0% F12/T12  | $1.38 \pm 0.01$     | $3.84 \pm 0.01$   | $3.29 \pm 0.02$ | $27.45 \pm 0.73$   | $33.41 \pm 0.18$ |
| P100%-C0% F18/T6   | $1.05 \pm 0.01$     | $3.96 \pm 0.01$   | $3.36 \pm 0.02$ | $39.76 \pm 0.69$   | $25.32 \pm 0.17$ |
| P85%-C15% F6/T18   | $1.25 \pm 0.01$     | $3.83 \pm 0.02$   | $3.36 \pm 0.02$ | $139.61 \pm 0.97$  | $34.97 \pm 0.24$ |
| P85%-C15% F12/T12  | $1.32 \pm 0.01$     | $3.77 \pm 0.02$   | $3.38 \pm 0.02$ | $75.238 \pm 0.34$  | $37.93 \pm 0.18$ |
| P85%-C15% F18/T6   | $1.30 \pm 0.01$     | $3.76 \pm 0.02$   | $3.40 \pm 0.02$ | $89.038 \pm 0.49$  | $30.37 \pm 0.18$ |
| P70%-C30% F6/T18   | $2.28 \pm 0.01$     | $3.78 \pm 0.01$   | $3.50 \pm 0.01$ | $168.65 \pm 0.32$  | $32.49 \pm 0.02$ |
| P70%-C30% F12/T12  | $1.96 \pm 0.01$     | $4.01 \pm 0.01$   | $3.46 \pm 0.01$ | $133 \pm 0.22$     | $29.92 \pm 0.02$ |
| P70%-C30% F18/T6   | $2.41 \pm 0.01$     | $4.03 \pm 0.01$   | $3.41 \pm 0.01$ | $237.34 \pm 0.40$  | $33.88 \pm 0.02$ |
| P60%-C40% F6/T18   | $1.04 \pm 0.01$     | $3.74 \pm 0.02$   | $3.42 \pm 0.02$ | $42.06 \pm 0.54$   | $24.15 \pm 0.12$ |
| P60%-C40% F12/T12  | $1.25 \pm 0.01$     | $3.82 \pm 0.02$   | $3.41 \pm 0.02$ | $52.28 \pm 0.69$   | $24.67 \pm 0.13$ |
| P60%-C40% F18/T6   | $0.87 \pm 0.01$     | $4.12 \pm 0.01$   | $3.30 \pm 0.02$ | $30.37 \pm 0.51$   | $23.21 \pm 0.16$ |
| P50%-C50% F6/T18   | $2.09 \pm 0.01$     | $3.39 \pm 0.01$   | $3.68 \pm 0.01$ | $69.92 \pm 0.12$   | $23.58 \pm 0.01$ |
| P50%-C50% F12/T12  | $1.75 \pm 0.01$     | $3.75 \pm 0.01$   | $3.48 \pm 0.01$ | $105.66 \pm 0.21$  | $29.32 \pm 0.02$ |
| P50%-C50% F18/T6_3 | $1.77 \pm 0.01$     | $3.47 \pm 0.01$   | $3.56 \pm 0.01$ | $107.87 \pm 0.67$  | $28.57 \pm 0.12$ |
| P30%-C70% F6/T18   | $1.60 \pm 0.01$     | $3.85 \pm 0.01$   | $3.52 \pm 0.01$ | $44.91 \pm 0.08$   | $22.01 \pm 0.02$ |
| P30%-C70% F12/T12  | $1.83 \pm 0.01$     | $3.99 \pm 0.01$   | $3.48 \pm 0.01$ | $140.24 \pm 0.24$  | $31.71 \pm 0.02$ |
| P30%-C70% F18/T6   | $1.34 \pm 0.01$     | $3.75 \pm 0.01$   | $3.59 \pm 0.01$ | $47.79 \pm 0.10$   | $23.39 \pm 0.02$ |

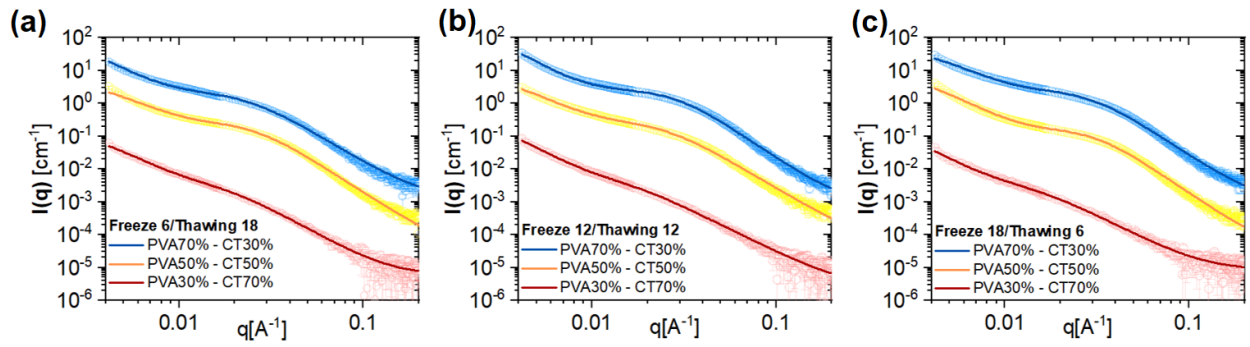

**Figure S3.** SAXS intensity curves  $I(q)$  vs.  $q$  for samples with CT Medium- $M_w$  and different PVA/CT, for FT cycles **(a)** F6/T18 and **(b)** F12/T12 and **(c)** F18/T6. For clarity the curves are displaced along the y-axes. Lines are fits to the model of eq. 3 in the main article

**Table S2.** SAXS parameters obtained from modeling the curves for Medium- $M_w$  of Figure S2 using eq. 3 of the main article.

| Sample             | $I_{\text{lor}}(0)$ | $\zeta$ [nm]    | $m$             | $I_{\text{ex}}(0)$ | $a$ [nm]         |
|--------------------|---------------------|-----------------|-----------------|--------------------|------------------|
| P70%-C30% F6/T18   | $2.12 \pm 0.01$     | $4.24 \pm 0.01$ | $3.37 \pm 0.01$ | $151.61 \pm 0.52$  | $34.58 \pm 0.04$ |
| P70%-C30% F12/T12  | $2.50 \pm 0.01$     | $3.48 \pm 0.01$ | $3.76 \pm 0.01$ | $488.51 \pm 0.91$  | $42.48 \pm 0.02$ |
| P70%-C30% F18/T6   | $2.40 \pm 0.01$     | $3.39 \pm 0.01$ | $3.70 \pm 0.01$ | $72.04 \pm 0.15$   | $22.39 \pm 0.02$ |
| P50%-C50% F6/T18   | $2.49 \pm 0.01$     | $3.81 \pm 0.01$ | $3.63 \pm 0.01$ | $68.86 \pm 0.16$   | $22.89 \pm 0.02$ |
| P50%-C50% F12/T12  | $2.72 \pm 0.01$     | $4.02 \pm 0.01$ | $3.34 \pm 0.01$ | $109.20 \pm 0.23$  | $25.65 \pm 0.02$ |
| P50%-C50% F18/T6_3 | $1.57 \pm 0.01$     | $3.19 \pm 0.01$ | $3.83 \pm 0.02$ | $126.93 \pm 0.24$  | $26.29 \pm 0.02$ |
| P30%-C70% F6/T18   | $0.38 \pm 0.01$     | $5.68 \pm 0.02$ | $3.12 \pm 0.01$ | $23.91 \pm 0.13$   | $27.22 \pm 0.05$ |
| P30%-C70% F12/T12  | $0.56 \pm 0.01$     | $6.54 \pm 0.02$ | $2.81 \pm 0.01$ | $77.44 \pm 0.35$   | $37.16 \pm 0.05$ |
| P30%-C70% F18/T6   | $0.37 \pm 0.01$     | $6.95 \pm 0.02$ | $2.88 \pm 0.01$ | $38.03 \pm 0.37$   | $38.15 \pm 0.11$ |

### 3. SEM images, confocal stacks and porosity renderings

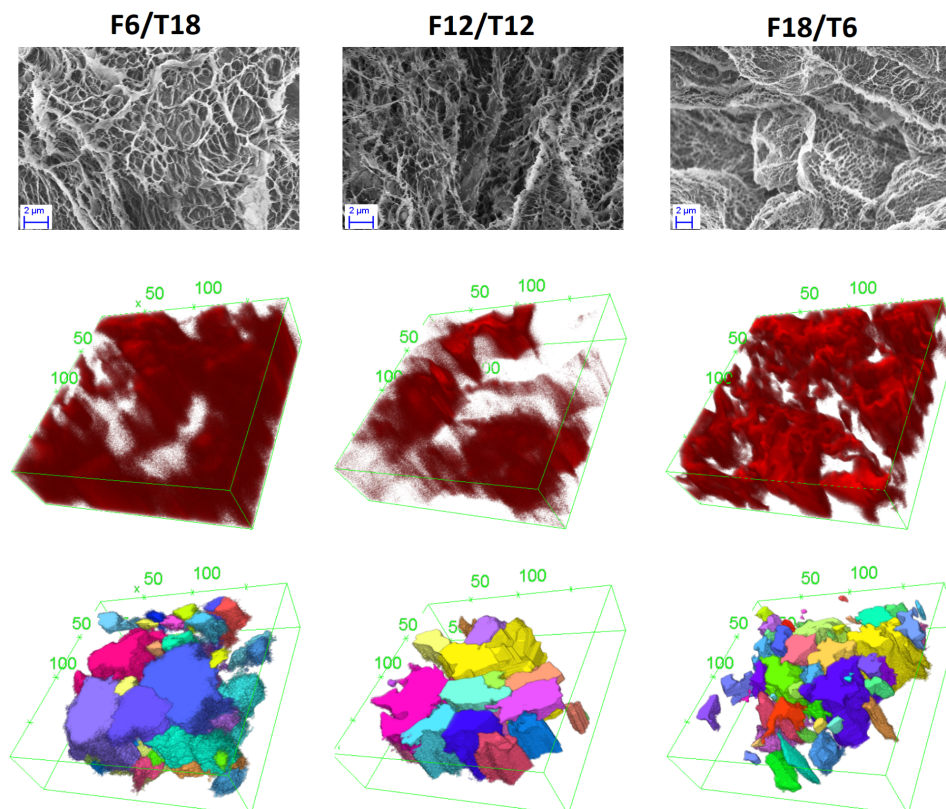

**Figure S4.** Images correspond to PVA30%- CT70% and different Freeze/Thawing times. **Top** SEM images, scale bar 2μm. **Middle** 3D confocal microscopy images. **Bottom** Hydrogel pore reconstruction using MorpholibJ, units are in μm.

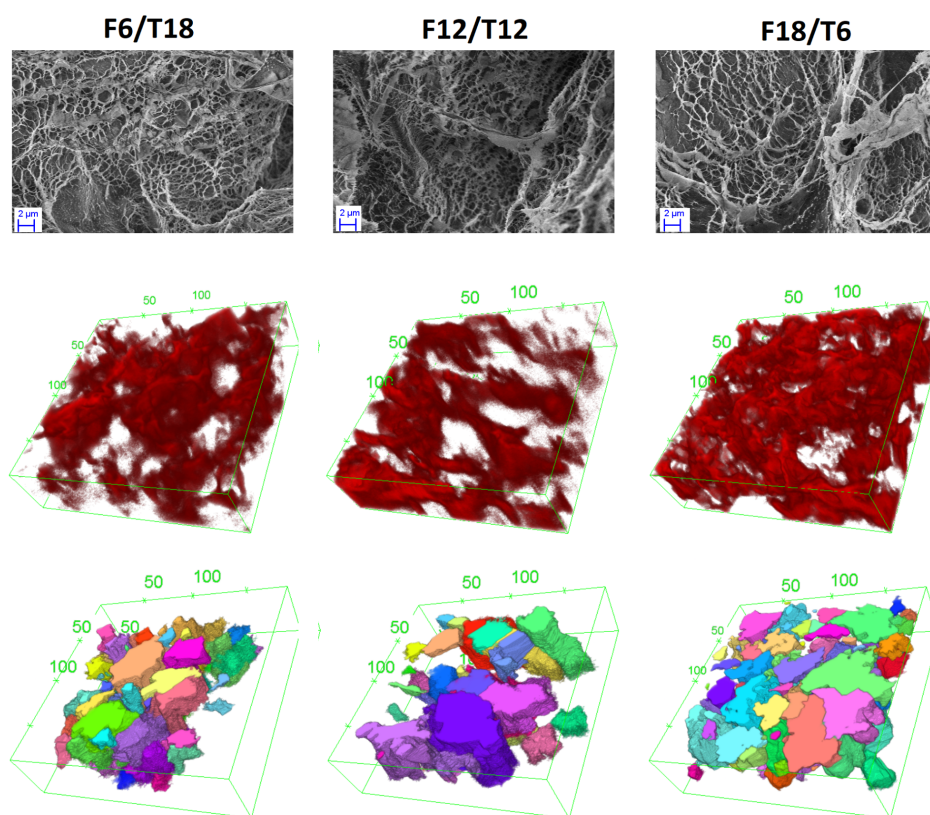

**Figure S5.** Images correspond to PVA50%- CT50% and different Freeze/Thawing times. **Top** SEM images, scale bar 2μm. **Middle** 3D confocal microscopy images. **Bottom** Hydrogel pore reconstruction using MorpholibJ, units are in μm.

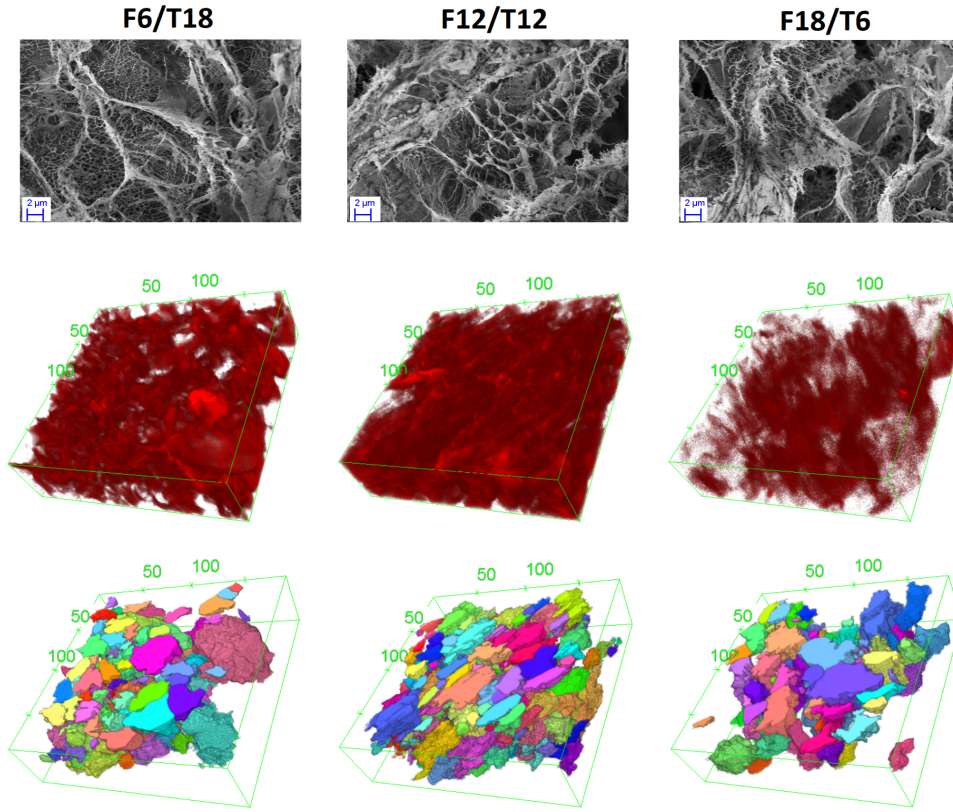

**Figure S6.** Images correspond to PVA70%- CT30% and different Freeze/Thawing times. **Top** SEM images, scale bar 2 $\mu$ m. **Middle** 3D confocal microscopy images. **Bottom** Hydrogel pore reconstruction using MorpholibJ, units are in  $\mu$ m.

#### 4. 2D porosity parameters and pore volume and sphericity distributions:

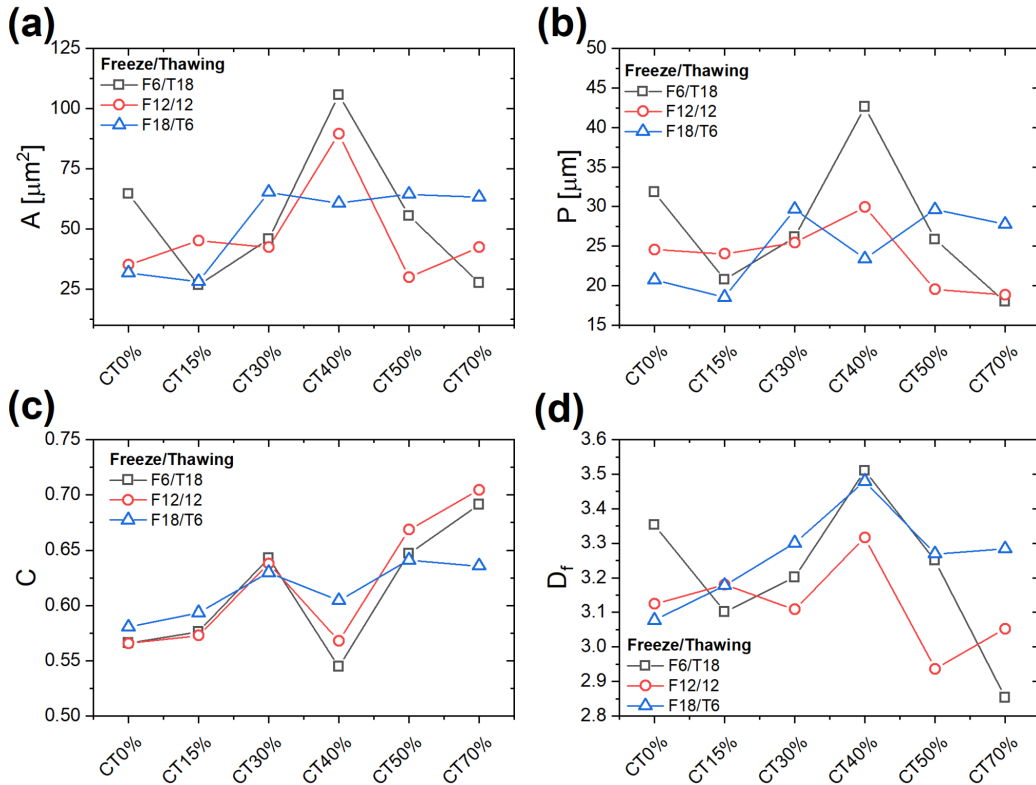

**Figure S7.** 2D porosity parameters as a function of CT content and for different FT times. **(a)** Average pore area (A). **(b)** Average pore perimeter (P). **(c)** Circularity (C) parameter calculated as  $C = 4\pi(A/P^2)$ . **(d)** Fractal dimension of pores  $D_f$ , calculated using the relationship;  $A \propto P^{2/D_f}$ .

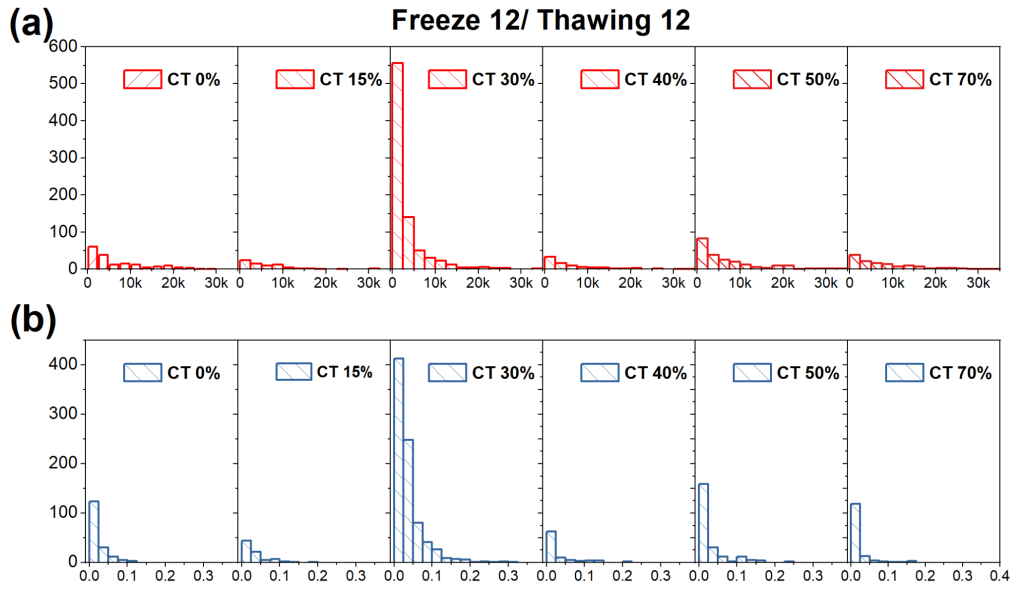

**Figure S8. (a)** Average pore volume distribution and **(b)** Sphericity distribution for samples obtained using a F12/T12 cycle and different CT content.

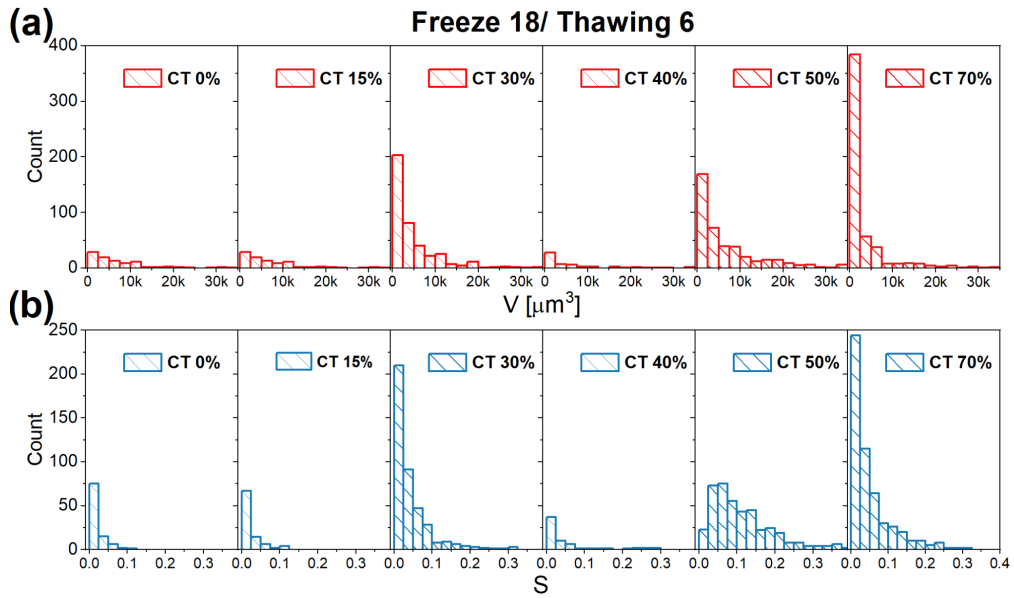

**Figure S9. (a)** Average pore volume distribution and **(b)** Sphericity distribution for samples obtained using a F18/T6 cycle and different CT content.

## 5. Rheological data

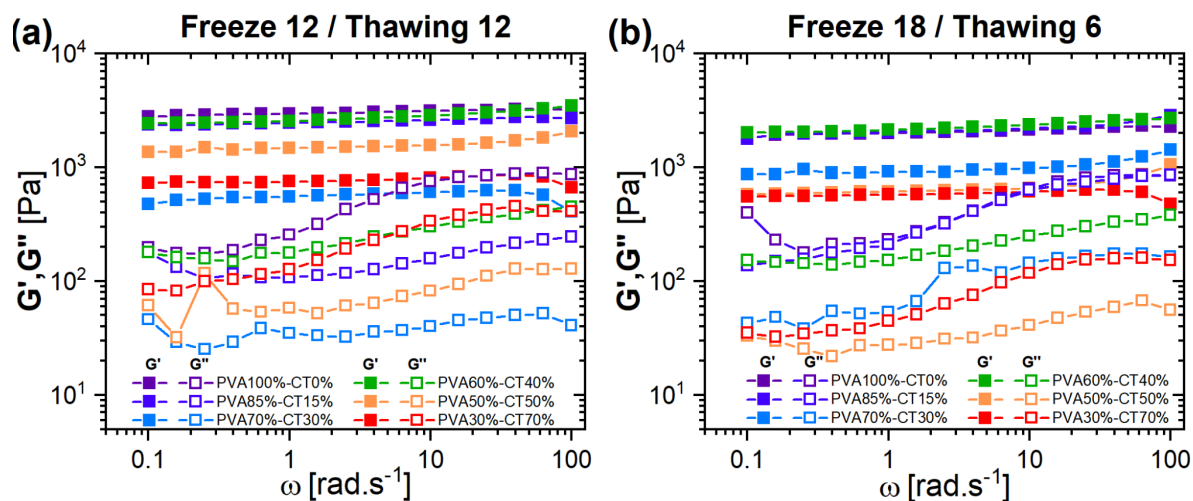

**Figure S10.** Hydrogel viscoelastic moduli, storage- $G'(\omega)$  and loss- $G''(\omega)$ , for different PVA/CT contents and diverse freeze-thawing times **(a)** F12/T12 and **(b)** F18/T6, as a function of oscillation frequency  $\omega$ .
